# Supplementary material
Source: publisher figshare collection journal article supplement (https://acs.figshare.com/ndownloader/files/14072297)
Supplement: Supplementary file 1 [file 14072297]

# Supporting Information

## Chemical and electrochemical alkali cations intercalation/release in an ionic hydrogen bonded network

Geoffrey Gerer,<sup>a,b</sup> Frédéric Melin,<sup>b</sup> Petra Hellwig,<sup>b\*</sup> Mir Wais Hosseini<sup>a\*</sup> and Sylvie Ferlay<sup>a\*</sup>

<sup>a</sup> Molecular Tectonics Laboratory, University of Strasbourg, UMR UDS-CNRS 7140, Institut le Bel, 4, rue Blaise Pascal, F-67000 Strasbourg, France  
[ferlay@unistra.fr](mailto:ferlay@unistra.fr), [hosseini@unistra.fr](mailto:hosseini@unistra.fr)

<sup>b</sup> Laboratoire de Bioélectrochimie et Spectroscopie, University of Strasbourg, UMR UDS-CNRS 7140, Institut le Bel, 4, rue Blaise Pascal, F-67000 Strasbourg, France  
[hellwig@unistra.fr](mailto:hellwig@unistra.fr)

Purity of the used compounds:

### Elemental Analysis

$\text{Na}_2\mathbf{1}_3\text{-[Fe}^{\text{II}}(\text{CN})_6\text{]}_2$ : Elemental analysis calculated (%) for  $\text{C}_{90}\text{H}_{132}\text{Na}_2\text{Fe}_2\text{N}_{24}$  ( $\text{Na}_2(\text{Fe}(\text{CN})_6)_2(\text{C}_{26}\text{H}_{44}\text{N}_4)_3$ ). MeOH Anal. Calcd.: C 63.3%, H 7.8%, N 19.7%; found: C 63.7%, H 7.6%, N 19.6%.

$\text{K}_2\mathbf{1}_3\text{-[Fe}^{\text{II}}(\text{CN})_6\text{]}_2$ : Elemental analysis calculated (%) for  $\text{C}_{90}\text{H}_{132}\text{K}_2\text{Fe}_2\text{N}_{24}$  ( $\text{K}_2(\text{Fe}(\text{CN})_6)_2(\text{C}_{26}\text{H}_{44}\text{N}_4)_3$ ) Anal. Calcd.: C 62.1%, H 7.6%, N 19.3%; found: C 63.4%, H 7.5%, N 19.2%.

$\text{Cs}_2\mathbf{1}_3\text{-[Fe}^{\text{II}}(\text{CN})_6\text{]}_2$ : Elemental analysis calculated (%) for  $\text{C}_{90}\text{H}_{132}\text{Cs}_2\text{Fe}_2\text{N}_{24}$  ( $\text{Cs}_2(\text{Fe}(\text{CN})_6)_2(\text{C}_{26}\text{H}_{44}\text{N}_4)_3$ ) Anal. Calcd.: C 56.1%, H 6.9%, N 17.4%; found: C 57.6%, H 6.8%, N 17.3%.

$\mathbf{1}_3\text{-[Fe}^{\text{III}}(\text{CN})_6\text{]}_2$ : Elemental analysis calculated (%) for  $\text{C}_{90}\text{H}_{132}\text{Fe}_2\text{N}_{24}$  ( $(\text{Fe}(\text{CN})_6)_2(\text{C}_{26}\text{H}_{44}\text{N}_4)_3$ ) Anal. Calcd.: C 65.1%, H 8.0%, N 20.2%; found: C 66.3 %, H 8.2%, N 20.4%.

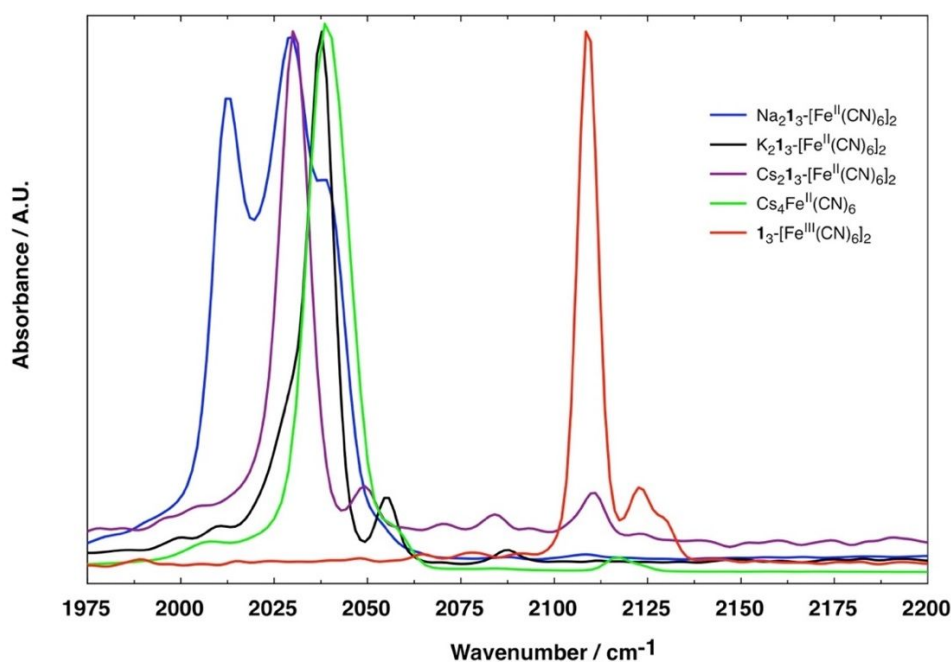

**Figure S1:** MIR absorbance spectra at room temperature for  $X_21_3\text{-[Fe}^{\text{I}}(\text{CN})_6]_2$  ( $X = \text{Na, K and Cs}$ ) and  $X_21_3\text{-[Fe}^{\text{III}}(\text{CN})_6]_2$  together with the one of starting salt  $\text{Cs}_4\text{[Fe}^{\text{I}}(\text{CN})_6]$  at RT for the spectral range specific for the  $\nu(\text{C}\equiv\text{N})$  vibrational modes.

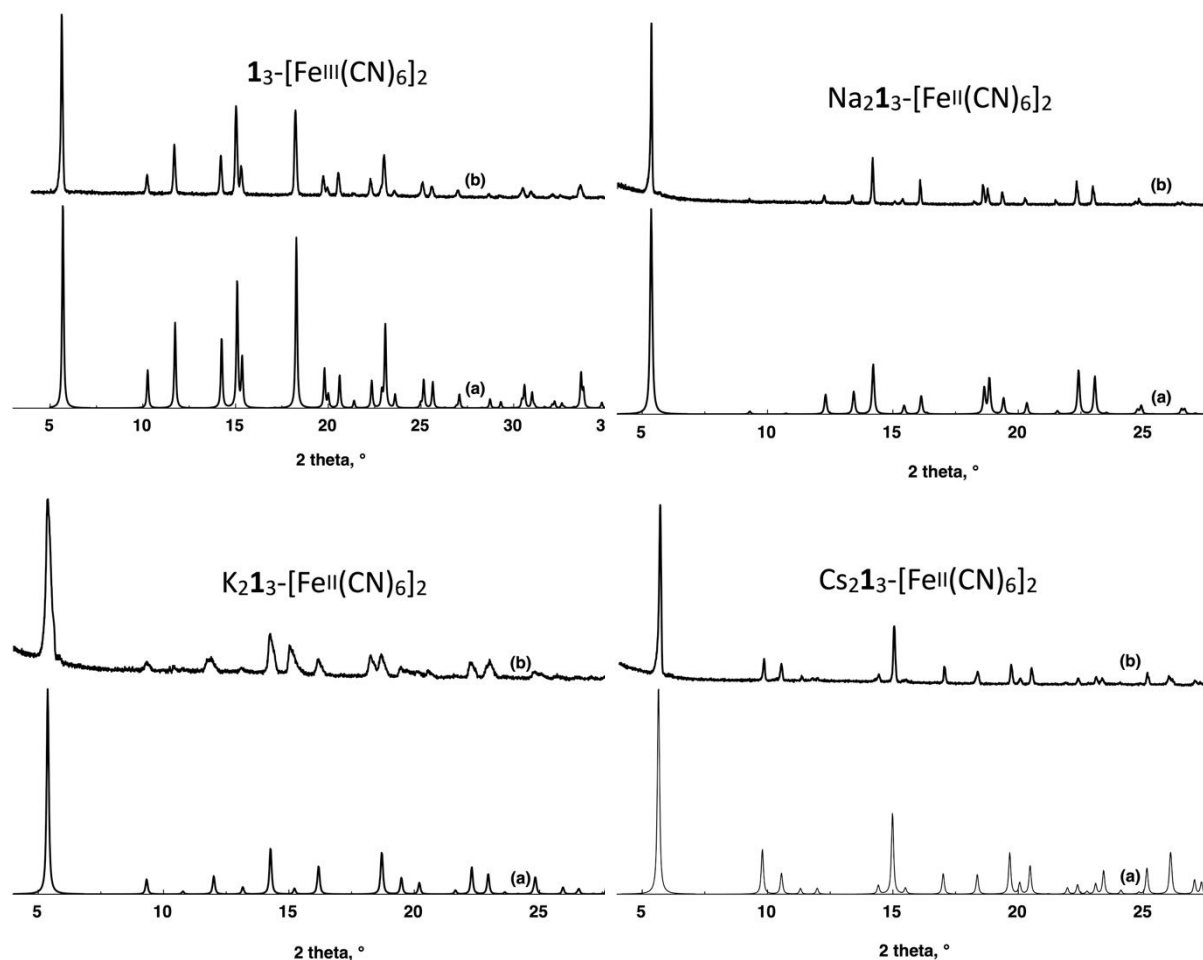

**Figure S2:** Comparison of the simulated (a) and (b) and recorded PXRD patterns for  $1_3\text{-[Fe}^{\text{I}}(\text{CN})_6]_2$  and  $X_21_3\text{-[Fe}^{\text{I}}(\text{CN})_6]_2$  ( $X = \text{Na, K and Cs}$ ). Discrepancies in intensity between the observed and simulated patterns are due to preferential orientations of the microcrystalline powders

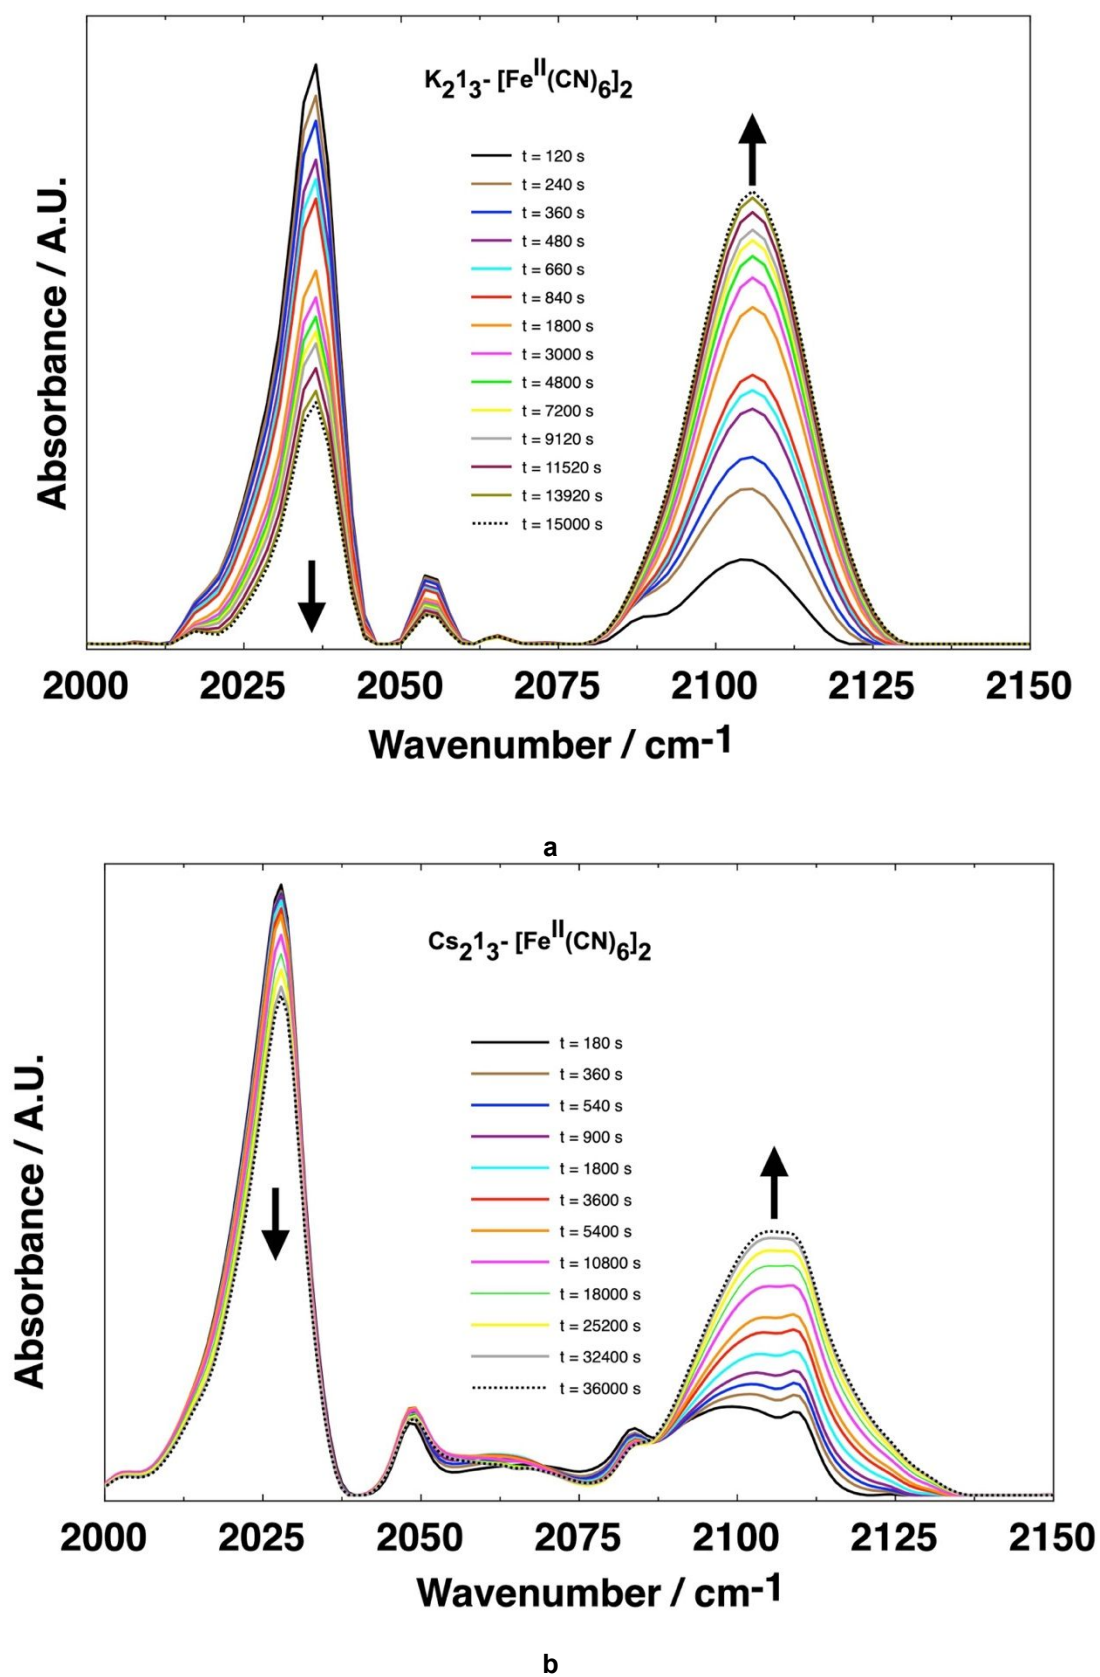

**Figure S3:** Kinetic study of the oxidation of  $\text{X}_2\text{1}_3^- [\text{Fe}^{\text{II}}(\text{CN})_6]_2$  (a) K, b) Cs) into  $\text{1}_3^- [\text{Fe}^{\text{III}}(\text{CN})_6]_2$  by  $\text{S}_2\text{O}_8^{2-}$  followed at RT by MIR spectroscopy for the 2000-2200  $\text{cm}^{-1}$  window.

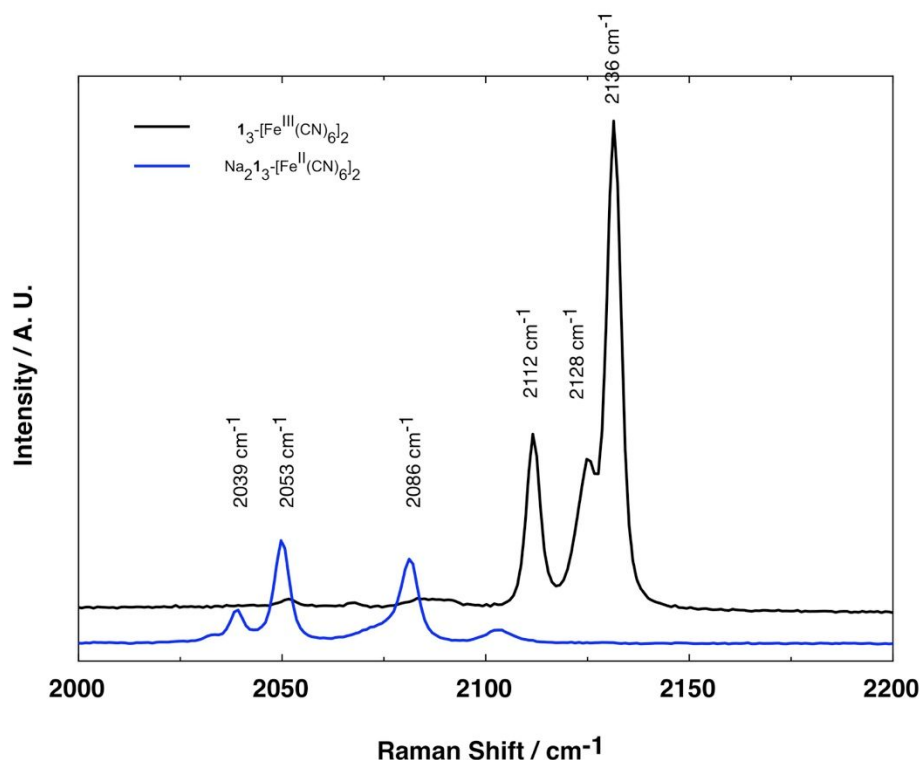

**Figure S4:** Raman spectra for  $Na_2[13-Fe^{II}(CN)_6]_2$  and  $[13-Fe^{III}(CN)_6]_2$  for the 2000-2200 cm<sup>-1</sup> window.

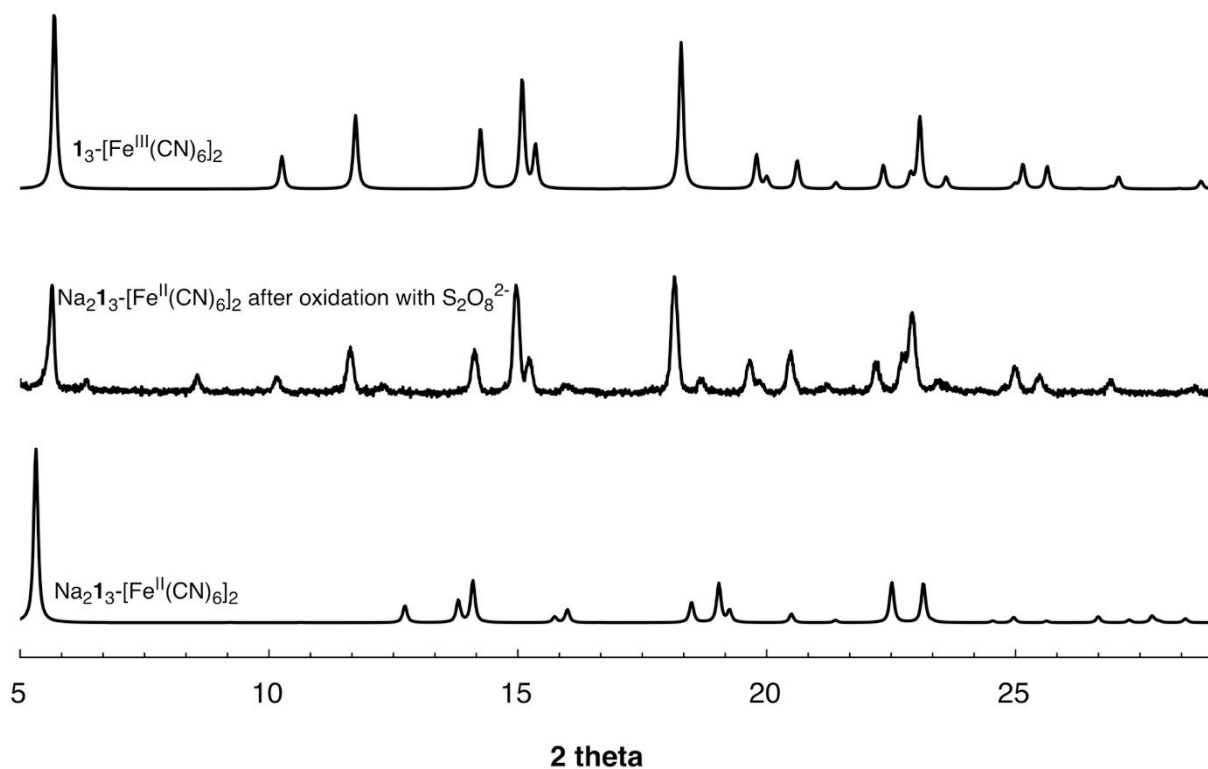

**Figure S5:** XRPD diagram for  $Na_2[13-Fe^{II}(CN)_6]_2$  after oxidation by  $S_2O_8^{2-}$  and comparison with the simulated XRPD diagrams for  $Na_2[13-Fe^{II}(CN)_6]_2$  and  $[13-Fe^{III}(CN)_6]_2$  (from XRD data)

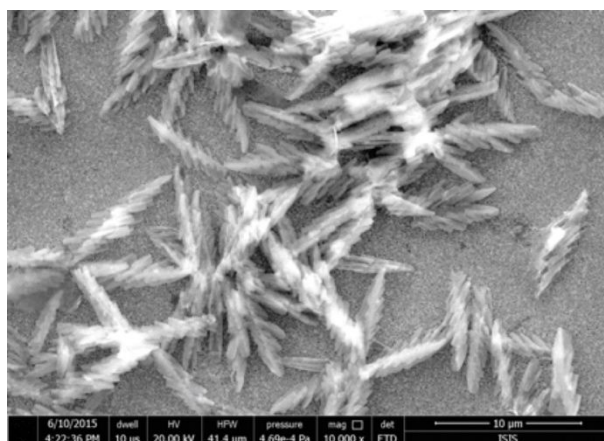

**Figure S6:** SEM micrograph images of a gold substrate immersed in a solution of **1-2Cl** +  $\text{K}_3[\text{Fe}^{\text{III}}(\text{CN})_6]$  in  $\text{H}_2\text{O}/\text{MeOH}$  (9/1) after 100 voltammetric cycles between -200 and +800 mV.

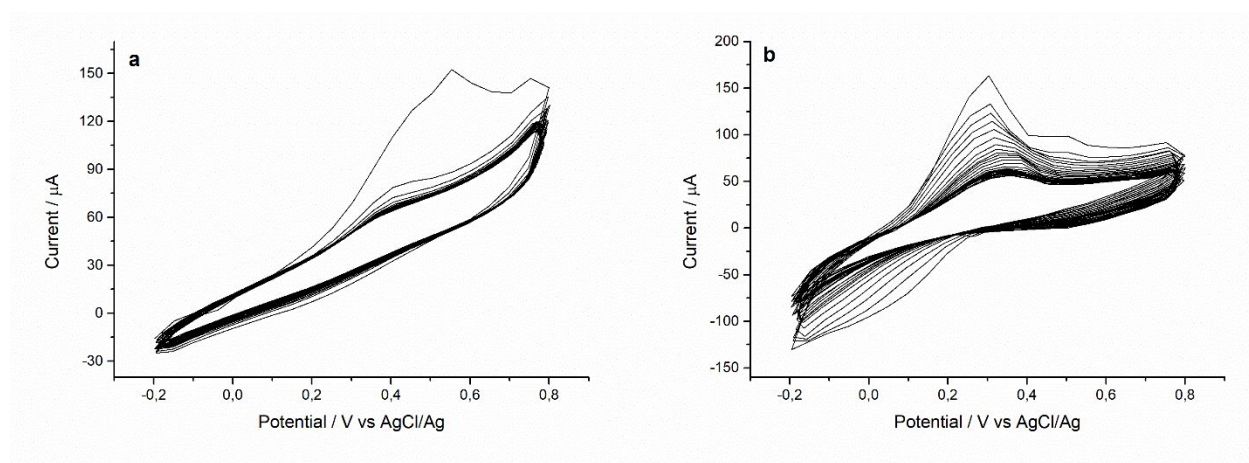

**Figure S7:** Cyclic voltammograms of gold substrate immersed for 2h into a a solution of (**1-2Cl** +  $\text{Na}_4[\text{Fe}^{\text{II}}(\text{CN})_6]$ ) (a) and (**1-2Cl** +  $\text{K}_3[\text{Fe}^{\text{III}}(\text{CN})_6]$ ) (b). Scan rate  $0.1 \text{ V.s}^{-1}$ .
